# Supplementary material for: N6-Methyladenosine Methyltransferase METTL3 Promotes Angiogenesis and Atherosclerosis by Upregulating the JAK2/STAT3 Pathway via m6A Reader IGF2BP1
Source: Front Cell Dev Biol. 2021 Dec 7;9:731810. doi: 10.3389/fcell.2021.731810 (PMC8689138; doi:10.3389/fcell.2021.731810)
Supplement: Supplementary file 1 [file Table2.xlsx]

## Sheet: Supplementary Table 2
Supplementary Table 2: Genes that were markedly downregulated (|log2FoldChange| > 1 and P <0.05) in METLL3 loss group versus the control group.
gene	gene_id	biotype	strand	locus	siME_FPKM	siNC_FPKM	Fold change	log2(fold change)	p_value	Regulation
PPP1R32	ENSG00000162148	protein_coding	+	chr11:61170120-61258403	0.066198	1.53055	-23.1208	-4.53112	0.0088	down
SERF1A	ENSG00000172058	protein_coding	+	chr5:69140556-70320941	0.107726	2.0333	-18.8747	-4.23838	0.0013	down
GPNMB	ENSG00000136235	protein_coding	+	chr7:23275585-23314727	0.118123	2.15587	-18.2511	-4.18991	5e-05	down
CXCL10	ENSG00000169245	protein_coding	-	chr4:76932336-77033955	33.5471	590.088	-17.5898	-4.13667	5e-05	down
CXCL11	ENSG00000169248	protein_coding	-	chr4:76932336-77033955	9.89779	145.804	-14.731	-3.88078	5e-05	down
IFIT2	ENSG00000119922	protein_coding	+	chr10:90973325-91174314	6.30964	78.7669	-12.4836	-3.64196	5e-05	down
SLFN12L	ENSG00000205045	protein_coding	-	chr17:33791267-33864880	0.16623	2.03506	-12.2424	-3.61382	0.0035	down
IL7	ENSG00000104432	protein_coding	-	chr8:79578281-79717758	0.128681	1.27357	-9.89713	-3.30701	0.0022	down
C1S	ENSG00000182326	protein_coding	+	chr12:7072407-7178336	0.819654	8.10348	-9.88643	-3.30545	0.0001	down
GAD1	ENSG00000128683	protein_coding	+	chr2:171669722-171717661	0.164949	1.53953	-9.33338	-3.2224	0.0002	down
CD38	ENSG00000004468	protein_coding	+	chr4:15779897-15857611	0.146119	1.33598	-9.14308	-3.19268	0.00685	down
ATP10A	ENSG00000206190	protein_coding	-	chr15:25922419-26110317	0.17341	1.55357	-8.95895	-3.16333	0.0085	down
IFIT1	ENSG00000185745	protein_coding	+	chr10:90973325-91174314	27.2104	224.064	-8.23449	-3.04168	5e-05	down
FAM26F	ENSG00000188820	protein_coding	+	chr6:116781901-116784934	0.176391	1.44634	-8.19964	-3.03556	0.0299	down
RTP4	ENSG00000136514	protein_coding	+	chr3:187086119-187089864	1.60268	12.849	-8.01715	-3.00309	5e-05	down
RSAD2	ENSG00000134321	protein_coding	+	chr2:6980683-7038370	39.7222	305.523	-7.69147	-2.94326	5e-05	down
OASL	ENSG00000135114	protein_coding	-	chr12:121458094-121477045	8.39768	63.889	-7.60796	-2.92751	5e-05	down
SOCS1	ENSG00000185338	protein_coding	-	chr16:11343475-11445619	0.498751	3.73792	-7.49454	-2.90584	0.0464	down
TMEM229B	ENSG00000198133	protein_coding	-	chr14:67913800-68067004	0.187208	1.39729	-7.46385	-2.89992	0.00205	down
IFITM1	ENSG00000185885	protein_coding	+	chr11:307630-315272	31.2086	231.673	-7.42335	-2.89207	5e-05	down
GBP5	ENSG00000154451	protein_coding	-	chr1:89724632-89738544	2.08155	15.3902	-7.39367	-2.88629	5e-05	down
SLC16A10	ENSG00000112394	protein_coding	+	chr6:111408780-111580237	0.225872	1.65548	-7.32927	-2.87367	0.00375	down
IL36G	ENSG00000136688	protein_coding	+	chr2:113730779-113743242	0.55286	4.03862	-7.30498	-2.86888	0.0042	down
MX2	ENSG00000183486	protein_coding	+	chr21:42733869-42781317	20.9937	145.293	-6.92076	-2.79093	5e-05	down
LGALS9	ENSG00000168961	protein_coding	+	chr17:25783669-25976586	22.013	143.163	-6.50356	-2.70123	5e-05	down
BTC	ENSG00000174808	protein_coding	-	chr4:75669968-75719896	0.870222	5.54347	-6.37016	-2.67133	5e-05	down
EGFLAM	ENSG00000164318	protein_coding	+	chr5:38258510-38468441	0.209967	1.31902	-6.28203	-2.65123	0.0056	down
IL18RAP	ENSG00000115607	protein_coding	+	chr2:103035148-103069025	0.255901	1.59955	-6.25067	-2.64401	0.0218	down
AGAP4	ENSG00000188234	protein_coding	-	chr10:46321041-46349323	0.183516	1.14673	-6.24867	-2.64355	0.0404	down
IFIT3	ENSG00000119917	protein_coding	+	chr10:90973325-91174314	29.788	184.541	-6.19511	-2.63113	5e-05	down
AKR1E2	ENSG00000165568	protein_coding	+	chr10:4828820-4890254	0.44446	2.74318	-6.17197	-2.62573	0.00335	down
SECTM1	ENSG00000141574	protein_coding	-	chr17:80278899-80291950	0.931829	5.65669	-6.07052	-2.60182	0.00065	down
ZFHX4	ENSG00000091656	protein_coding	+	chr8:77316232-77779521	0.3373	2.00959	-5.95788	-2.5748	0.00065	down
BATF2	ENSG00000168062	protein_coding	-	chr11:64755414-64764517	3.10999	17.6241	-5.66694	-2.50257	5e-05	down
TEC	ENSG00000135605	protein_coding	-	chr4:48137799-48271881	0.489638	2.7559	-5.62846	-2.49274	0.0056	down
CPNE4	ENSG00000196353	protein_coding	-	chr3:131252398-132004254	0.221268	1.2428	-5.61669	-2.48972	0.00955	down
TNFSF10	ENSG00000121858	protein_coding	-	chr3:172223297-172241297	6.07361	34.0389	-5.6044	-2.48656	5e-05	down
CPM	ENSG00000135678	protein_coding	-	chr12:69201955-69365350	0.242555	1.35314	-5.5787	-2.47993	0.00605	down
PHKG1	ENSG00000164776	protein_coding	-	chr7:56148439-56160689	0.318568	1.7532	-5.50339	-2.46032	0.0041	down
DDX58	ENSG00000107201	protein_coding	-	chr9:32455299-32526322	57.2922	312.662	-5.45731	-2.44819	5e-05	down
ACACB	ENSG00000076555	protein_coding	+	chr12:109549022-109706031	0.236296	1.26493	-5.35319	-2.4204	0.0044	down
FER1L6	ENSG00000214814	protein_coding	+	chr8:124864226-125183763	0.506274	2.70506	-5.34307	-2.41767	5e-05	down
SYCP2	ENSG00000196074	protein_coding	-	chr20:58438617-58508710	0.212464	1.12849	-5.31143	-2.4091	0.0106	down
NKAIN1	ENSG00000084628	protein_coding	-	chr1:31652591-31712401	0.600155	3.15792	-5.26185	-2.39557	0.0002	down
LGALS3BP	ENSG00000108679	protein_coding	-	chr17:76967319-76976191	0.880779	4.61801	-5.2431	-2.39042	0.00125	down
TLR3	ENSG00000164342	protein_coding	+	chr4:186990305-187009223	2.99845	15.5195	-5.17587	-2.3718	5e-05	down
HERC5	ENSG00000138646	protein_coding	+	chr4:89378267-89427314	8.71239	45.0366	-5.16927	-2.36996	5e-05	down
RET	ENSG00000165731	protein_coding	+	chr10:43572474-43625799	1.14476	5.89904	-5.15306	-2.36543	0.0006	down
CPED1	ENSG00000106034	protein_coding	+	chr7:120628730-120937498	0.23605	1.21482	-5.14649	-2.36359	0.0098	down
CYP2J2	ENSG00000134716	protein_coding	-	chr1:60358979-60392462	0.264733	1.33187	-5.03102	-2.33085	0.00875	down
ANKRD45	ENSG00000183831	protein_coding	-	chr1:173469602-173639001	0.316804	1.5743	-4.96933	-2.31305	0.02565	down
APOL1	ENSG00000100342	protein_coding	+	chr22:36649055-36663576	6.53541	32.4204	-4.96072	-2.31055	5e-05	down
OAS2	ENSG00000111335	protein_coding	+	chr12:113344581-113455556	66.9847	330.183	-4.92922	-2.30136	5e-05	down
CFB	ENSG00000243649	protein_coding	+	chr6:31865561-31919861	2.91005	14.2176	-4.88572	-2.28857	5e-05	down
GBP4	ENSG00000162654	protein_coding	-	chr1:89646830-89664615	8.17746	39.6995	-4.85476	-2.2794	5e-05	down
TBX15	ENSG00000092607	protein_coding	-	chr1:119425668-119532179	0.399406	1.89714	-4.74991	-2.2479	0.0009	down
SAMD9	ENSG00000205413	protein_coding	-	chr7:92728828-92747336	17.6605	83.8351	-4.74705	-2.24703	5e-05	down
CMPK2	ENSG00000134326	protein_coding	-	chr2:6980683-7038370	27.2096	124.536	-4.5769	-2.19437	5e-05	down
EPSTI1	ENSG00000133106	protein_coding	-	chr13:43460523-43566407	19.4172	88.4321	-4.55433	-2.18724	5e-05	down
JAM2	ENSG00000154721	protein_coding	+	chr21:27011583-27144771	0.846003	3.80449	-4.49702	-2.16897	0.0482	down
IFI6	ENSG00000126709	protein_coding	-	chr1:27992571-27998729	111.382	500.002	-4.48908	-2.16642	5e-05	down
OAS1	ENSG00000089127	protein_coding	+	chr12:113344581-113455556	39.3722	176.36	-4.47932	-2.16328	5e-05	down
TSNAXIP1	ENSG00000102904	protein_coding	+	chr16:67840667-67906470	0.27698	1.22781	-4.43284	-2.14823	0.0172	down
BST2	ENSG00000130303	protein_coding	-	chr19:17513747-17516457	30.1866	132.648	-4.39426	-2.13562	5e-05	down
GMPR	ENSG00000137198	protein_coding	+	chr6:16238810-16295780	9.57584	41.4281	-4.32632	-2.11314	5e-05	down
IFIH1	ENSG00000115267	protein_coding	-	chr2:163123588-163175213	26.2072	113.294	-4.32299	-2.11203	5e-05	down
FAM46A	ENSG00000112773	protein_coding	-	chr6:82201155-82462491	1.85231	7.95299	-4.29355	-2.10217	5e-05	down
TNFSF13B	ENSG00000102524	protein_coding	+	chr13:108903587-108960832	2.85689	12.2349	-4.28261	-2.09849	0.0072	down
TGFBR3	ENSG00000069702	protein_coding	-	chr1:92145901-92371892	1.10546	4.66673	-4.22151	-2.07776	0.00285	down
CBWD7	ENSG00000215126	protein_coding	+	chr9:42668607-42714962	1.54187	6.49222	-4.21061	-2.07403	0.0004	down
GBP1	ENSG00000117228	protein_coding	-	chr1:89518001-89531043	43.3878	182.563	-4.20769	-2.07303	5e-05	down
RNF213	ENSG00000173821	protein_coding	+	chr17:78234664-78411886	140.79	586.002	-4.16224	-2.05736	5e-05	down
SAMD9L	ENSG00000177409	protein_coding	-	chr7:92759367-92777682	23.6272	98.1912	-4.15584	-2.05514	5e-05	down
C1orf228	ENSG00000198520	protein_coding	+	chr1:45140363-45191263	0.354726	1.46956	-4.14281	-2.05061	0.00295	down
ODF3B	ENSG00000177989	protein_coding	-	chr22:50961996-50971009	1.5818	6.50465	-4.11217	-2.0399	0.00425	down
SYT14	ENSG00000143469	protein_coding	+	chr1:210111518-210337636	0.453609	1.86043	-4.10141	-2.03612	0.0239	down
TMEM71	ENSG00000165071	protein_coding	-	chr8:133697252-133772958	0.37921	1.53972	-4.06034	-2.0216	0.0049	down
GCH1	ENSG00000131979	protein_coding	-	chr14:55308725-55369570	9.63648	38.5744	-4.00297	-2.00107	5e-05	down
RUNX3	ENSG00000020633	protein_coding	-	chr1:25226001-25291612	1.60428	6.38698	-3.98122	-1.99321	0.00025	down
DSP	ENSG00000096696	protein_coding	+	chr6:7541807-7586950	6.23225	24.7934	-3.97824	-1.99213	5e-05	down
HERC6	ENSG00000138642	protein_coding	+	chr4:89299890-89364263	24.9846	99.3911	-3.9781	-1.99208	5e-05	down
IFIT5	ENSG00000152778	protein_coding	+	chr10:91174342-91180758	36.4038	144.599	-3.97209	-1.9899	5e-05	down
CLEC2D	ENSG00000069493	protein_coding	+	chr12:9817564-9852151	1.78283	7.02405	-3.93982	-1.97813	5e-05	down
IFI35	ENSG00000068079	protein_coding	+	chr17:41158741-41166473	18.599	73.2684	-3.93936	-1.97796	5e-05	down
ISG15	ENSG00000187608	protein_coding	+	chr1:948802-949920	117.646	463.323	-3.93829	-1.97757	5e-05	down
ETV7	ENSG00000010030	protein_coding	-	chr6:36322418-36458920	2.38153	9.27032	-3.89259	-1.96073	0.04285	down
PDZRN3	ENSG00000121440	protein_coding	-	chr3:73431583-73675149	0.314504	1.22028	-3.88001	-1.95606	0.02655	down
TRIM69	ENSG00000185880	protein_coding	+	chr15:45021185-45060027	7.32756	28.2876	-3.86045	-1.94877	5e-05	down
HLA-F	ENSG00000204642	protein_coding	+	chr6:29690551-29716826	7.99104	30.6989	-3.84166	-1.94173	5e-05	down
IFI44L	ENSG00000137959	protein_coding	+	chr1:79085606-79111830	85.9919	330.318	-3.84126	-1.94158	5e-05	down
CATSPERG	ENSG00000099338	protein_coding	+	chr19:38826414-38861589	0.54016	2.05664	-3.80746	-1.92883	0.0159	down
RASAL3	ENSG00000105122	protein_coding	-	chr19:15562434-15575382	0.455561	1.72782	-3.79271	-1.92323	0.0135	down
STARD5	ENSG00000172345	protein_coding	-	chr15:81451915-81616524	0.95239	3.52161	-3.69765	-1.88661	0.00035	down
DYNC1I1	ENSG00000158560	protein_coding	+	chr7:95401865-95739634	0.369164	1.36232	-3.69028	-1.88373	0.00535	down
SLC16A4	ENSG00000168679	protein_coding	-	chr1:110905469-110974982	0.660389	2.435	-3.68721	-1.88253	0.01965	down
TRANK1	ENSG00000168016	protein_coding	-	chr3:36868310-36986548	10.2767	37.5856	-3.65735	-1.8708	0.00085	down
C1orf61	ENSG00000125462	protein_coding	-	chr1:156374041-156400493	0.892555	3.23521	-3.62467	-1.85785	0.00105	down
DDX60L	ENSG00000181381	protein_coding	-	chr4:169277885-169931426	59.059	213.832	-3.62065	-1.85625	5e-05	down
CCDC146	ENSG00000135205	protein_coding	+	chr7:76139744-77054760	0.469924	1.66192	-3.53657	-1.82235	0.0415	down
CCL5	ENSG00000161570	protein_coding	-	chr17:34195970-34212867	11.6457	41.0806	-3.52753	-1.81866	5e-05	down
MX1	ENSG00000157601	protein_coding	+	chr21:42792230-42831141	190.285	670.288	-3.52255	-1.81662	5e-05	down
ISG20	ENSG00000172183	protein_coding	+	chr15:89178867-89199714	35.3538	124.239	-3.51416	-1.81318	5e-05	down
SAMHD1	ENSG00000101347	protein_coding	-	chr20:35504523-35580246	30.5748	107.365	-3.51153	-1.8121	5e-05	down
STAT1	ENSG00000115415	protein_coding	-	chr2:191745522-191885686	57.4137	200.926	-3.49962	-1.8072	5e-05	down
SIDT1	ENSG00000072858	protein_coding	+	chr3:113251142-113348425	0.384241	1.33978	-3.48684	-1.80192	0.0342	down
IFI44	ENSG00000137965	protein_coding	+	chr1:79115480-79129763	62.876	217.779	-3.46362	-1.79228	5e-05	down
MLIP	ENSG00000146147	protein_coding	+	chr6:53794779-54131078	0.563282	1.93099	-3.4281	-1.77741	0.02705	down
PPM1K	ENSG00000163644	protein_coding	-	chr4:89178771-89205921	4.99665	16.9942	-3.40112	-1.76601	5e-05	down
NPIPA7	ENSG00000183889	protein_coding	+	chr16:16404197-16444447	3.14704	10.6741	-3.39177	-1.76204	0.0041	down
ZNF433	ENSG00000197647	protein_coding	-	chr19:12098431-12167127	0.855064	2.88049	-3.36874	-1.75221	0.0069	down
BATF3	ENSG00000123685	protein_coding	-	chr1:212859759-212873327	1.95069	6.56444	-3.36519	-1.75069	0.0031	down
TREX1	ENSG00000213689	protein_coding	+	chr3:48488113-48509044	6.81014	22.6854	-3.33113	-1.73601	0.00465	down
APOBEC3G	ENSG00000239713	protein_coding	+	chr22:39436608-39483748	3.97326	13.2283	-3.32933	-1.73523	5e-05	down
CA8	ENSG00000178538	protein_coding	-	chr8:61099905-61193971	0.821634	2.73448	-3.3281	-1.7347	0.0133	down
PCDH17	ENSG00000118946	protein_coding	+	chr13:58205943-58303445	2.13955	7.07455	-3.30656	-1.72533	5e-05	down
SLC15A3	ENSG00000110446	protein_coding	-	chr11:60680637-60720002	18.4128	60.6491	-3.29386	-1.71978	0.0002	down
KYNU	ENSG00000115919	protein_coding	+	chr2:143635066-143799890	1.67413	5.48341	-3.27537	-1.71166	0.00095	down
RASGEF1B	ENSG00000138670	protein_coding	-	chr4:82347546-82965397	0.472632	1.54334	-3.2654	-1.70726	0.0349	down
IFITM2	ENSG00000185201	protein_coding	+	chr11:307630-315272	86.9216	281.668	-3.24049	-1.69621	5e-05	down
SYNPO2	ENSG00000172403	protein_coding	+	chr4:119809995-119982402	0.657114	2.12405	-3.23239	-1.6926	5e-05	down
CAPN3	ENSG00000092529	protein_coding	+	chr15:42500610-42704516	0.812772	2.61523	-3.21766	-1.68601	0.03805	down
GABRE	ENSG00000102287	protein_coding	-	chrX:151121595-151143152	11.0384	35.2305	-3.19164	-1.6743	5e-05	down
PLEKHH2	ENSG00000152527	protein_coding	+	chr2:43864411-43995126	1.0729	3.42125	-3.18879	-1.67301	0.01425	down
ANKRD37	ENSG00000186352	protein_coding	+	chr4:186317174-186347139	1.32973	4.19942	-3.15811	-1.65906	0.041	down
SP110	ENSG00000135899	protein_coding	-	chr2:230990025-231268447	27.4482	86.6349	-3.15631	-1.65824	5e-05	down
SERPINB2	ENSG00000197632	protein_coding	+	chr18:61538925-61609601	8.65294	26.9652	-3.11631	-1.63984	5e-05	down
XAF1	ENSG00000132530	protein_coding	+	chr17:6658765-6678966	40.2719	124.676	-3.09586	-1.63034	5e-05	down
UBE2L6	ENSG00000156587	protein_coding	-	chr11:57319128-57335757	31.7911	98.3137	-3.09249	-1.62877	5e-05	down
IFI30	ENSG00000216490	protein_coding	+	chr19:18263927-18288927	4.75526	14.6004	-3.07039	-1.61842	5e-05	down
STAT4	ENSG00000138378	protein_coding	-	chr2:191886251-192038902	0.381312	1.15657	-3.03314	-1.60081	0.0463	down
TRIM22	ENSG00000132274	protein_coding	+	chr11:5684424-5959849	63.7121	192.977	-3.02889	-1.59879	5e-05	down
STAT2	ENSG00000170581	protein_coding	-	chr12:56735380-56753939	30.498	92.2802	-3.02577	-1.5973	5e-05	down
OAS3	ENSG00000111331	protein_coding	+	chr12:113344581-113455556	69.0016	208.493	-3.02155	-1.59529	5e-05	down
CPEB1	ENSG00000214575	protein_coding	-	chr15:83205503-83378666	0.57345	1.73235	-3.02092	-1.59499	0.02995	down
TMEM140	ENSG00000146859	protein_coding	+	chr7:134671258-134855547	8.02567	24.1882	-3.01385	-1.59161	5e-05	down
KCNT2	ENSG00000162687	protein_coding	-	chr1:196194908-196578355	0.916367	2.73999	-2.99005	-1.58017	0.0003	down
TMEM62	ENSG00000137842	protein_coding	+	chr15:43398422-43513481	10.1476	30.3242	-2.98831	-1.57933	5e-05	down
PARP9	ENSG00000138496	protein_coding	-	chr3:122246770-122294050	24.2904	72.4349	-2.98204	-1.5763	5e-05	down
TTLL7	ENSG00000137941	protein_coding	-	chr1:84330710-84464833	1.01062	3.01301	-2.98134	-1.57596	0.02255	down
TYMP	ENSG00000025708	protein_coding	-	chr22:50961996-50971009	12.9152	38.2449	-2.96124	-1.5662	5e-05	down
UBA7	ENSG00000182179	protein_coding	-	chr3:49842639-49851379	10.0255	29.6513	-2.95759	-1.56442	5e-05	down
TAP1	ENSG00000168394	protein_coding	-	chr6:32808493-32827362	36.42	107.472	-2.95091	-1.56116	5e-05	down
APOL6	ENSG00000221963	protein_coding	+	chr22:36044423-36064456	8.52622	25.0752	-2.94095	-1.55628	5e-05	down
MAP2	ENSG00000078018	protein_coding	+	chr2:210288781-210598842	7.81765	22.9875	-2.94046	-1.55604	5e-05	down
CTSS	ENSG00000163131	protein_coding	-	chr1:150702671-150738433	43.2252	126.571	-2.92819	-1.55001	5e-05	down
WDR52	ENSG00000206530	protein_coding	-	chr3:112929849-113160457	1.02367	2.99245	-2.92326	-1.54758	0.04785	down
CASP1	ENSG00000137752	protein_coding	-	chr11:104896169-104972158	3.56323	10.4151	-2.92294	-1.54742	0.0019	down
SHF	ENSG00000138606	protein_coding	-	chr15:45384847-45493373	0.6859	1.99324	-2.90603	-1.53905	0.0226	down
SHH	ENSG00000164690	protein_coding	-	chr7:155592679-155604967	0.917387	2.6616	-2.90128	-1.53669	0.00935	down
FBLN1	ENSG00000077942	protein_coding	+	chr22:45898117-45998697	0.407088	1.17921	-2.89668	-1.5344	0.0183	down
CBLN2	ENSG00000141668	protein_coding	-	chr18:70203914-70305756	0.618069	1.77106	-2.86547	-1.51877	0.0156	down
GCNT4	ENSG00000176928	protein_coding	-	chr5:74323288-74326724	2.14899	6.14582	-2.85987	-1.51595	5e-05	down
GCA	ENSG00000115271	protein_coding	+	chr2:163175349-163695240	7.77721	22.092	-2.84061	-1.5062	5e-05	down
CASZ1	ENSG00000130940	protein_coding	-	chr1:10696660-10856707	1.36847	3.88178	-2.83657	-1.50415	0.00145	down
ZNF425	ENSG00000204947	protein_coding	-	chr7:148799875-148823438	1.50625	4.25484	-2.82478	-1.49814	0.0393	down
LAP3	ENSG00000002549	protein_coding	+	chr4:17578814-17616194	80.502	227.003	-2.81985	-1.49562	5e-05	down
PTGFR	ENSG00000122420	protein_coding	+	chr1:78695282-79005434	0.772141	2.15656	-2.79295	-1.48179	0.00035	down
CFI	ENSG00000205403	protein_coding	-	chr4:110661851-110723335	3.89748	10.8379	-2.78074	-1.47547	5e-05	down
IL1B	ENSG00000125538	protein_coding	-	chr2:113587327-113594480	1.79549	4.89641	-2.72707	-1.44735	0.0018	down
PARP14	ENSG00000173193	protein_coding	+	chr3:122399464-122449687	96.3229	262.61	-2.72635	-1.44697	5e-05	down
SMIM14	ENSG00000163683	protein_coding	-	chr4:39500374-39640710	7.24984	19.5669	-2.69895	-1.4324	0.0381	down
GLIS3	ENSG00000107249	protein_coding	-	chr9:3824126-4348392	3.2345	8.63133	-2.66852	-1.41604	0.0006	down
SYTL3	ENSG00000164674	protein_coding	+	chr6:159071045-159185908	1.69591	4.51215	-2.6606	-1.41175	0.0102	down
PSMB9	ENSG00000240065	protein_coding	+	chr6:32808493-32827362	16.8542	44.7922	-2.65763	-1.41014	0.0085	down
PLSCR1	ENSG00000188313	protein_coding	-	chr3:146232966-146262651	127.884	338.879	-2.64989	-1.40593	5e-05	down
DDX60	ENSG00000137628	protein_coding	-	chr4:169137443-169239958	22.3188	58.9277	-2.64028	-1.40069	5e-05	down
CD69	ENSG00000110848	protein_coding	-	chr12:9905081-9913497	6.1845	16.3192	-2.63872	-1.39984	5e-05	down
DLL1	ENSG00000198719	protein_coding	-	chr6:170591293-170599561	1.68392	4.42399	-2.62719	-1.39352	5e-05	down
TRAFD1	ENSG00000135148	protein_coding	+	chr12:112563304-112591407	14.1186	37.0726	-2.62579	-1.39275	5e-05	down
DTX3L	ENSG00000163840	protein_coding	+	chr3:122246770-122294050	39.2399	102.326	-2.6077	-1.38278	5e-05	down
BTN3A3	ENSG00000111801	protein_coding	+	chr6:26440699-26453643	4.42211	11.516	-2.6042	-1.38084	0.0011	down
RGS20	ENSG00000147509	protein_coding	+	chr8:54764367-54871863	3.91214	10.1369	-2.59113	-1.37358	0.0004	down
MDC1	ENSG00000137337	protein_coding	-	chr6:30667583-30685666	9.21624	23.7847	-2.58075	-1.36779	0.00035	down
RGS7	ENSG00000182901	protein_coding	-	chr1:240928856-241520530	0.699534	1.79213	-2.56189	-1.35721	0.00775	down
ELOVL7	ENSG00000164181	protein_coding	-	chr5:60047617-60140216	0.715064	1.81945	-2.54446	-1.34736	0.0136	down
PURG	ENSG00000172733	protein_coding	-	chr8:30853320-30891231	0.638251	1.61631	-2.53241	-1.34051	0.0131	down
C15orf48	ENSG00000166920	protein_coding	+	chr15:45722726-45878488	6.74442	17.033	-2.5255	-1.33657	0.0037	down
SPATA6L	ENSG00000106686	protein_coding	-	chr9:4490443-4666674	1.66566	4.19778	-2.52019	-1.33353	0.0011	down
TRIM34	ENSG00000258659	protein_coding	+	chr11:5274419-5667019	2.18469	5.43933	-2.48975	-1.316	0.00095	down
INADL	ENSG00000132849	protein_coding	+	chr1:62208148-62629592	2.46936	6.13667	-2.48513	-1.31332	0.04485	down
TNFAIP6	ENSG00000123610	protein_coding	+	chr2:152194341-152236560	1.17841	2.9125	-2.47154	-1.30541	0.03475	down
C12orf39	ENSG00000134548	protein_coding	+	chr12:21679240-21757781	1.02684	2.52736	-2.4613	-1.29942	0.0219	down
XYLT2	ENSG00000015532	protein_coding	+	chr17:48423452-48440499	6.29673	15.4625	-2.45564	-1.2961	0.0043	down
IL6	ENSG00000136244	protein_coding	+	chr7:22765013-22771621	82.8819	203.352	-2.45351	-1.29485	5e-05	down
WWC1	ENSG00000113645	protein_coding	+	chr5:167718655-167899308	1.54223	3.78031	-2.4512	-1.29349	0.01355	down
FBXO6	ENSG00000116663	protein_coding	+	chr1:11724180-11734411	3.15868	7.71112	-2.44125	-1.28762	0.00145	down
HELZ2	ENSG00000130589	protein_coding	-	chr20:62189438-62205592	54.5058	132.8	-2.43643	-1.28477	0.0007	down
CD47	ENSG00000196776	protein_coding	-	chr3:107762144-107809872	18.3311	44.6563	-2.43609	-1.28457	5e-05	down
DHX58	ENSG00000108771	protein_coding	-	chr17:40253421-40264751	13.0142	31.5824	-2.42676	-1.27903	5e-05	down
NMI	ENSG00000123609	protein_coding	-	chr2:152126978-152146571	17.0171	41.2255	-2.42261	-1.27656	5e-05	down
RSPO3	ENSG00000146374	protein_coding	+	chr6:126660934-127518910	2.25471	5.45438	-2.4191	-1.27447	0.0147	down
RGS16	ENSG00000143333	protein_coding	-	chr1:182567757-182573543	1.05787	2.54462	-2.40542	-1.26629	0.00725	down
GBP3	ENSG00000117226	protein_coding	-	chr1:89472348-89488577	14.5228	34.9235	-2.40474	-1.26588	5e-05	down
TRIM25	ENSG00000121060	protein_coding	-	chr17:54965269-54991399	84.812	203.256	-2.39655	-1.26096	0.0001	down
XRN1	ENSG00000114127	protein_coding	-	chr3:142025448-142166904	22.3084	53.4244	-2.39481	-1.25991	5e-05	down
APOL2	ENSG00000128335	protein_coding	-	chr22:36622255-36636000	24.7634	59.2142	-2.39121	-1.25774	5e-05	down
DNAJC6	ENSG00000116675	protein_coding	+	chr1:65713901-65881689	1.58487	3.76494	-2.37555	-1.24826	0.00985	down
SYBU	ENSG00000147642	protein_coding	-	chr8:110586206-110704020	1.28497	3.048	-2.37203	-1.24612	0.02505	down
IFI27	ENSG00000165949	protein_coding	+	chr14:94571181-94583033	261.273	619.269	-2.3702	-1.24501	5e-05	down
FAM122C	ENSG00000156500	protein_coding	+	chrX:133903595-133988640	1.61534	3.81905	-2.36425	-1.24138	0.0348	down
LY6E	ENSG00000160932	protein_coding	+	chr8:144063154-144105249	61.2145	144.722	-2.36418	-1.24134	5e-05	down
CEACAM1	ENSG00000079385	protein_coding	-	chr19:42901279-43156507	2.62935	6.19785	-2.35718	-1.23706	0.00245	down
THEMIS2	ENSG00000130775	protein_coding	+	chr1:28199054-28213196	4.31322	10.1462	-2.35235	-1.2341	5e-05	down
SLC25A28	ENSG00000155287	protein_coding	-	chr10:101370281-101380366	34.2359	80.5257	-2.35208	-1.23394	5e-05	down
HLA-B	ENSG00000234745	protein_coding	-	chr6:31321648-31325414	279.657	653.668	-2.33739	-1.2249	5e-05	down
EIF2AK2	ENSG00000055332	protein_coding	-	chr2:37311593-37384208	53.2742	124.06	-2.32871	-1.21953	5e-05	down
F3	ENSG00000117525	protein_coding	-	chr1:94994731-95007413	2.42599	5.64755	-2.32793	-1.21905	0.04915	down
SLC39A11	ENSG00000133195	protein_coding	-	chr17:70642087-71088851	2.24022	5.20024	-2.32131	-1.21494	0.01205	down
PNPT1	ENSG00000138035	protein_coding	-	chr2:55861399-55921045	41.0456	95.2198	-2.31985	-1.21403	5e-05	down
TNFSF9	ENSG00000125657	protein_coding	+	chr19:6531009-6535931	1.5864	3.68014	-2.3198	-1.214	0.0073	down
KAT2B	ENSG00000114166	protein_coding	+	chr3:20081514-20195896	1.95441	4.52561	-2.31559	-1.21138	0.02055	down
TMEM175	ENSG00000127419	protein_coding	+	chr4:926174-952444	1.81995	4.20388	-2.30988	-1.20782	0.02255	down
FZD5	ENSG00000163251	protein_coding	-	chr2:208627309-208634287	1.88847	4.36142	-2.3095	-1.20758	5e-05	down
GANC	ENSG00000214013	protein_coding	+	chr15:42500610-42704516	8.37066	19.3224	-2.30835	-1.20686	0.0086	down
TNC	ENSG00000041982	protein_coding	-	chr9:117782805-117880536	0.892812	2.05968	-2.30696	-1.20599	0.0296	down
FST	ENSG00000134363	protein_coding	+	chr5:52776238-52782964	10.6625	24.5924	-2.30643	-1.20566	5e-05	down
LGALS8	ENSG00000116977	protein_coding	+	chr1:236681299-236767804	29.3188	67.5549	-2.30414	-1.20423	0.00355	down
ACTN2	ENSG00000077522	protein_coding	+	chr1:236849753-236927931	1.20438	2.76893	-2.29905	-1.20104	0.0117	down
C19orf66	ENSG00000130813	protein_coding	+	chr19:10196797-10213472	23.9577	54.9631	-2.29417	-1.19797	5e-05	down
APOBEC3D	ENSG00000243811	protein_coding	+	chr22:39410087-39429281	1.87057	4.29038	-2.29361	-1.19762	0.01525	down
PSMB8	ENSG00000204264	protein_coding	-	chr6:32808493-32827362	21.7308	49.7895	-2.29119	-1.1961	0.00275	down
NLRC5	ENSG00000140853	protein_coding	+	chr16:57023396-57117443	22.9364	52.5275	-2.29015	-1.19544	0.0012	down
NIPAL2	ENSG00000104361	protein_coding	-	chr8:99202060-99306621	3.22536	7.37613	-2.28691	-1.1934	0.0183	down
CX3CL1	ENSG00000006210	protein_coding	+	chr16:57406369-57418960	7.19586	16.3094	-2.26649	-1.18046	5e-05	down
P2RX7	ENSG00000089041	protein_coding	+	chr12:121570621-121623876	1.83179	4.14874	-2.26486	-1.17942	0.0017	down
HDDC2	ENSG00000111906	protein_coding	-	chr6:125440194-125623282	0.964946	2.1825	-2.26178	-1.17746	0.04175	down
DCP1A	ENSG00000162290	protein_coding	-	chr3:53317446-53381654	14.7602	33.2396	-2.25197	-1.17119	0.00175	down
COL11A2	ENSG00000204248	protein_coding	-	chr6:33130457-33160276	0.523726	1.1727	-2.23915	-1.16295	0.02675	down
NRK	ENSG00000123572	protein_coding	+	chrX:105066535-105202602	0.802421	1.79054	-2.23143	-1.15797	0.00055	down
TDRD7	ENSG00000196116	protein_coding	+	chr9:100164457-100258407	18.9784	42.3433	-2.23114	-1.15778	5e-05	down
NUAK2	ENSG00000163545	protein_coding	-	chr1:205271186-205290883	12.726	28.1789	-2.21428	-1.14684	5e-05	down
ZNF608	ENSG00000168916	protein_coding	-	chr5:123972607-124084500	2.49176	5.49607	-2.20571	-1.14124	0.0106	down
IRF2	ENSG00000168310	protein_coding	-	chr4:185308866-185395734	9.62421	21.2103	-2.20386	-1.14003	0.0017	down
HES4	ENSG00000188290	protein_coding	-	chr1:934341-935552	10.7364	23.4586	-2.18496	-1.12761	0.00015	down
IFITM3	ENSG00000142089	protein_coding	-	chr11:318639-330122	220.465	479.886	-2.17671	-1.12215	5e-05	down
TLR2	ENSG00000137462	protein_coding	+	chr4:154622651-154626851	0.509193	1.10537	-2.17082	-1.11824	0.0195	down
GPR89B	ENSG00000188092	protein_coding	+	chr1:147400505-147465753	1.7528	3.78538	-2.15962	-1.11078	0.01025	down
KIAA1715	ENSG00000144320	protein_coding	-	chr2:176788619-176867567	4.2727	9.22228	-2.15841	-1.10997	0.0117	down
TMEM158	ENSG00000249992	protein_coding	-	chr3:45265957-45267770	1.43386	3.08412	-2.15093	-1.10496	0.01615	down
TRIM6	ENSG00000121236	protein_coding	+	chr11:5274419-5667019	0.876836	1.88574	-2.15062	-1.10475	0.02595	down
JAK2	ENSG00000096968	protein_coding	+	chr9:4985032-5128183	6.1092	13.1359	-2.15018	-1.10446	5e-05	down
ZNFX1	ENSG00000124201	protein_coding	-	chr20:47835883-47905797	28.2226	60.5653	-2.14599	-1.10164	5e-05	down
TMEM171	ENSG00000157111	protein_coding	+	chr5:72416118-72427644	2.85603	6.11794	-2.14212	-1.09904	0.00465	down
IRF8	ENSG00000140968	protein_coding	+	chr16:85932408-85956215	2.77882	5.94276	-2.13859	-1.09666	0.0434	down
L2HGDH	ENSG00000087299	protein_coding	-	chr14:50704280-50883179	2.26304	4.83845	-2.13803	-1.09628	0.0262	down
NLRC4	ENSG00000091106	protein_coding	-	chr2:32449521-32490923	0.530177	1.12498	-2.12189	-1.08535	0.02645	down
SCARB2	ENSG00000138760	protein_coding	-	chr4:77079889-77135046	41.2019	87.294	-2.11869	-1.08317	5e-05	down
B2M	ENSG00000166710	protein_coding	+	chr15:45003674-45011075	1570.02	3325.11	-2.11786	-1.08261	5e-05	down
NMRK1	ENSG00000106733	protein_coding	-	chr9:77675488-77703133	3.77166	7.95082	-2.10805	-1.07591	0.00475	down
SLC8A3	ENSG00000100678	protein_coding	-	chr14:70510933-70696904	0.618108	1.30289	-2.10786	-1.07578	0.0131	down
DDX26B	ENSG00000165359	protein_coding	+	chrX:134654007-134716435	2.54271	5.35653	-2.10662	-1.07493	0.0001	down
SLC8A1	ENSG00000183023	protein_coding	-	chr2:40013592-40838193	1.34619	2.83159	-2.10341	-1.07273	0.00635	down
LGMN	ENSG00000100600	protein_coding	-	chr14:93170151-93215047	34.9655	73.4772	-2.10141	-1.07136	5e-05	down
LAMA3	ENSG00000053747	protein_coding	+	chr18:21269406-21535030	1.64953	3.46115	-2.09825	-1.06919	0.0212	down
SEMA4D	ENSG00000187764	protein_coding	-	chr9:91975701-92113045	4.35392	9.11833	-2.09427	-1.06645	0.00395	down
PDZD2	ENSG00000133401	protein_coding	+	chr5:31639516-32122047	4.30842	9.00573	-2.09026	-1.06368	0.00415	down
SLC41A2	ENSG00000136052	protein_coding	-	chr12:105196330-105352522	17.02	35.4421	-2.08238	-1.05823	0.0003	down
ASPHD2	ENSG00000128203	protein_coding	+	chr22:26825238-26879803	4.35421	9.05103	-2.07868	-1.05567	0.0009	down
PLA2G16	ENSG00000176485	protein_coding	-	chr11:63340666-63389143	8.70339	18.078	-2.07711	-1.05458	0.00605	down
CXXC5	ENSG00000171604	protein_coding	+	chr5:139026883-139063467	2.06055	4.27352	-2.07396	-1.05239	0.0291	down
TTC39A	ENSG00000085831	protein_coding	-	chr1:51752929-51810788	1.56662	3.24862	-2.07365	-1.05217	0.0436	down
HDAC6	ENSG00000094631	protein_coding	+	chrX:48659783-48683392	12.0652	25.0049	-2.07248	-1.05136	0.0072	down
TPK1	ENSG00000196511	protein_coding	-	chr7:144149033-144533488	4.52451	9.37291	-2.07159	-1.05074	0.0026	down
TTC39B	ENSG00000155158	protein_coding	-	chr9:15163619-15307358	4.12009	8.51035	-2.06557	-1.04654	5e-05	down
MRPL48	ENSG00000175581	protein_coding	+	chr11:73498360-73576178	5.70934	11.7921	-2.06541	-1.04643	0.0055	down
CAMK2D	ENSG00000145349	protein_coding	-	chr4:114372187-114683083	11.2424	23.1688	-2.06085	-1.04324	5e-05	down
LAMP3	ENSG00000078081	protein_coding	-	chr3:182840000-182881627	8.5843	17.5124	-2.04006	-1.02861	5e-05	down
GNG4	ENSG00000168243	protein_coding	-	chr1:235710986-235814054	1.8989	3.86266	-2.03416	-1.02443	0.02425	down
HEXDC	ENSG00000169660	protein_coding	+	chr17:80347098-80408705	5.79978	11.7726	-2.02983	-1.02136	0.019	down
SLC30A4	ENSG00000104154	protein_coding	-	chr15:45722726-45878488	1.98744	4.03229	-2.02889	-1.02069	0.03735	down
TRIM14	ENSG00000106785	protein_coding	-	chr9:100819020-100881494	15.9744	32.3453	-2.02483	-1.0178	5e-05	down
CD74	ENSG00000019582	protein_coding	-	chr5:149781199-149792492	1.20023	2.42848	-2.02334	-1.01674	0.04215	down
HIVEP2	ENSG00000010818	protein_coding	-	chr6:143069579-143266338	10.8704	21.9553	-2.01973	-1.01416	0.0054	down
DISC1	ENSG00000162946	protein_coding	+	chr1:231664398-232177019	2.75661	5.56742	-2.01966	-1.01411	0.0367	down
CLIP3	ENSG00000105270	protein_coding	-	chr19:36505409-36545664	2.14468	4.32923	-2.01859	-1.01335	0.03325	down
UNC93B1	ENSG00000110057	protein_coding	-	chr11:67758574-67772452	6.49975	13.0879	-2.0136	-1.00978	0.00085	down
GBP2	ENSG00000162645	protein_coding	-	chr1:89571814-89641723	7.71791	15.5239	-2.0114	-1.0082	5e-05	down
TRIM21	ENSG00000132109	protein_coding	-	chr11:4406126-4414926	20.012	40.2003	-2.00881	-1.00634	5e-05	down
USP18	ENSG00000184979	protein_coding	+	chr22:18632665-18660164	87.7398	176.053	-2.00653	-1.0047	5e-05	down
N4BP1	ENSG00000102921	protein_coding	-	chr16:48572636-48654059	25.6894	51.4031	-2.00094	-1.00068	5e-05	down
JADE2	ENSG00000043143	protein_coding	+	chr5:133860002-133918918	9.83295	19.6703	-2.00044	-1.00032	0.0029	down
