# Supplementary material for: N6-Methyladenosine Methyltransferase METTL3 Promotes Angiogenesis and Atherosclerosis by Upregulating the JAK2/STAT3 Pathway via m6A Reader IGF2BP1
Source: Front Cell Dev Biol. 2021 Dec 7;9:731810. doi: 10.3389/fcell.2021.731810 (PMC8689138; doi:10.3389/fcell.2021.731810)
Supplement: Supplementary file 2 [file Table3.xlsx]

## Sheet: Supplementary Table 3
Supplementary Table 3: Common genes in Supplementary Table 1 and 2.
RSAD2
SLC8A1
FAM46A
NKAIN1
GBP1
LGALS8
PNPT1
FER1L6
HERC5
HIVEP2
IFIH1
GBP5
USP18
L2HGDH
TRIM22
RNF213
TRANK1
SLFN12L
CCL5
TRIM25
EIF2AK2
OAS2
PARP9
UBE2L6
SERPINB2
HERC6
MX1
DSP
LGALS3BP
CTSS
HLA-F
SAMD9L
ZFHX4
ETV7
SYNPO2
XAF1
IFIT2
DDX60L
XRN1
MAP2
SEMA4D
CFB
RUNX3
JADE2
NUAK2
SAMD9
TMEM229B
ISG15
ZNFX1
JAK2
TBX15
NLRC5
DDX58
SECTM1
PCDH17
IFIT5
MX2
BATF2
CXCL11
FZD5
N4BP1
CLEC2D
IFI6
TRIM34
EPSTI1
B2M
APOL6
WWC1
CX3CL1
TTC39A
RET
PARP14
TRIM69
CD38
SPATA6L
TNFSF10
SLC15A3
FST
IFIT3
PLSCR1
UBA7
IFI44
GMPR
LAP3
PPM1K
TNFSF13B
TLR3
KAT2B
PLEKHH2
GBP3
LY6E
IFIT1
APOL2
ANKRD45
CASP1
APOL1
OAS1
SLC41A2
CPEB1
IRF8
LAMP3
CXCL10
BST2
TRIM21
DDX60
NMI
C19orf66
CPED1
STAT1
SLC30A4
GBP2
OAS3
SP110
IFITM2
PSMB9
PDZD2
IFI27
LGALS9
THEMIS2
IFI30
DTX3L
OASL
SLC25A28
TRIM14
IFI35
GBP4
CD69
IFI44L
ISG20
CAMK2D
SLC16A10
BTN3A3
DLL1
APOBEC3G
ATP10A
KCNT2
CPM
IL1B
CASZ1
TAP1
IL7
IFITM1
HELZ2
BTC
CYP2J2
DHX58
C1S
CMPK2
EGFLAM
TDRD7
IFITM3
SOCS1
SAMHD1
FBXO6
SIDT1
CEACAM1
CA8
CD47
HLA-B
UNC93B1
TMEM140
STAT2
NRK
