# Supplementary material for: N6-Methyladenosine Methyltransferase METTL3 Promotes Angiogenesis and Atherosclerosis by Upregulating the JAK2/STAT3 Pathway via m6A Reader IGF2BP1
Source: Front Cell Dev Biol. 2021 Dec 7;9:731810. doi: 10.3389/fcell.2021.731810 (PMC8689138; doi:10.3389/fcell.2021.731810)
Supplement: Supplementary file 5 [file Table1.xlsx]

## Sheet: Supplementary Table 1
Supplementary Table 1: Genes with the notable reduction (|log2FoldChange| > 1 and P <0.05) in the m6A methylation levels of mRNAs in METLL3 loss group versus the control group.
GeneName
RSAD2
RGPD1
SLC8A1
UBN2
TBC1D1
FAM46A
FBXL22
NKAIN1
GBP1
LGALS8
FBN1
ACSL5
SYT16
PNPT1
FER1L6
HERC5
FGF5
PIK3AP1
CR1L
RP11-1167A19.2
COL1A2
HIVEP2
IFIH1
GBP5
USP18
L2HGDH
INSRR
LRP2BP
NXF1
PARPBP
ANKIB1
TRIM22
GDNF
TRIM39
NLRC3
RNF213
RAP2A
TBC1D17
SYNE1
SRGAP3
TRANK1
AKAP5
SLFN12L
CCL5
TRIM25
EIF2AK2
ACAP2
OAS2
TRIM38
SF3B6
PARP9
LZTS2
PML
UBE2L6
SERPINB2
GOLGA4
HERC6
C3
CYP21A2
MX1
DSP
LGALS3BP
PRRG4
CTSS
STS
GRIK4
BEND6
FBXW2
ABCA5
TRO
FAM3B
IL15RA
HLA-F
CHRNB2
FAM174B
SAMD9L
AL136531.1
GRIN1
ST6GALNAC2
ZFHX4
ETV7
GLT8D2
TFCP2L1
C3orf67
SYNPO2
XAF1
ARAP2
ZCCHC2
TMEFF2
CGNL1
TMEM110
LTB4R
IFIT2
RBM41
IRF4
MTRNR2L10
DDX60L
XRN1
ITSN1
NUB1
MAP2
SEMA4D
SSTR2
CFB
RUNX3
JADE2
ELAVL3
HR
SBK1
CPNE8
NUAK2
ATP2B4
SAMD9
NFYC
IL16
FBXO39
GBP7
DNM3
C4orf33
UBE2D1
NAGLU
MAK
TMEM229B
CKAP2
ISG15
ZNFX1
JAK2
CD274
MYD88
MYO7A
XRCC1
SULT1C2
TBX15
NLRC5
CRLF3
ZNF687
MAP3K13
DDX58
HK2
SECTM1
PDE5A
RALB
BMS1
CMYA5
SLC35B4
PCDH17
HOXD3
TAOK3
PRRT2
FAM120B
HCAR1
RBM43
MMP13
IFIT5
MX2
SPATS2L
TMEM168
BATF2
USP47
LRRC8E
CXCL11
FZD5
S1PR2
USP6
ANK1
ARHGEF38
N4BP1
APOBEC3F
SLCO5A1
CLEC2D
TEX14
ZBTB42
ANGPTL1
IFI6
TRIM34
TMPRSS2
RXRG
CADM1
KLHDC7B
EPSTI1
KCNH4
B2M
RGPD4
APOL6
UBE2V1
WWC1
C14orf142
CEP104
CX3CL1
AC005481.5
RABGAP1L
ADCY1
TTC39A
ATP10B
GAREM
LIN54
NOD2
PHEX
C1R
RET
RIPK2
KIF21B
FAM231D
ZC3HAV1
PARP14
PLEKHA4
SSTR1
SAMD13
TTC32
ITGA4
EPOR
KPNA7
MCTP2
EIF2S3L
TRIM69
DZIP1L
SHOX2
COMMD6
HIPK3
SYN3
PNPLA7
CD38
ERO1B
SP100
SH3BP1
SPATA6L
SLC39A6
IL1R1
BLZF1
TNFSF10
DHRSX
PBOV1
BET1L
XIRP1
SLC15A3
FST
IFIT3
UBASH3A
C20orf194
GABARAPL3
KCNMB1
USP28
CDKL5
PLSCR1
APOL3
UBA7
IFI44
PSEN1
LRRC3DN
ZBTB20
ACO1
HOXB4
OSGIN2
SLC25A40
SLC8A2
MED13L
DCTN6
ANKRD13C
GMPR
AKT2
GLS
CSAG3
OBSCN
NBPF20
LDHAL6B
PRR20A
WDR33
LAP3
PPM1K
SUSD5
PALLD
FAM160A1
PEX1
HOXD4
TNFSF13B
LOC388692
PCBP1
BTN3A1
C11orf63
ONECUT2
TLR3
IDO1
KAT2B
LCORL
SHISA5
GLS2
PTPLA
HIF3A
PLEKHH2
NMB
PINLYP
TIGD4
GBP3
AGO4
RRM2B
CTD-2547L24.3
CDK5RAP2
POU3F2
XYLB
SEPT4
LRIG3
LY6E
PRX
IFIT1
SOX9
APOL2
FAM167A
SOX5
TMOD2
AK302306
ANKRD45
CASP1
APOL1
OAS1
ARHGEF26
CACNA2D1
CXCL9
GSN
SLC41A2
PARD3
HAP1
EPM2AIP1
IRF1
SWI5
KCNK13
C5orf56
CPEB1
IRF8
RBM24
PDE10A
SPACA3
LAMP3
PRKACA
MYRFL
BAG1
NBPF10
CXCL10
NEURL3
NCAPG2
SPSB1
IPP
ZFYVE26
POU2F2
VSIG10L
DOCK3
BST2
TRIM21
DDX60
GLI3
IL1A
RGPD3
NMI
C19orf66
CPED1
PDZK1IP1
MOB3C
CYB5D1
TESK2
STAT1
SLC30A4
SECISBP2L
CD68
RNF217
ZNF527
INPP4B
ATF2
WARS
ALDOC
BUD13
C1orf147
FGR
CDKN2A
TSHR
SKIDA1
AP3B2
SLFN12
TXN
GBP2
OAS3
FCHO2
ARNT2
SP110
CD83
IFITM2
PAK1
ARHGAP26
NUDCD1
PSMB9
PARP8
MAP4K3
DZIP3
PDZD2
IFI27
CCL4L1
LGALS9
IRF7
PGAM4
LIFR
AC087477.1
THEMIS2
LOC100133161
MDGA1
NEB
RPGRIP1L
ADGRF3
ALPK1
CCL4
SLC38A10
NIPAL3
ISM1
BCL2
C19orf48
AKAP7
NUDT7
IFI30
ATP6V1H
ENKUR
PPP2R3B
MEMO1
CCDC168
COL1A1
DTX3L
MAP4K4
SLC22A23
OASL
OGN
TBL1XR1
SLX4IP
ARHGAP12
SLC25A28
HELB
GRB14
KIAA1644
PHF15
DHRS1
SETD4
TMEM161A
IFIT1B
GPR179
TRIM14
OSBPL9
FRS2
ABCC3
TCN1
SERPING1
CACNA1A
FYB
IFI35
SCUBE3
OSCP1
GREM1
SLC35A2
CREM
RNF32
FCRLB
MAPK14
FAM21B
GOLGA6L1
OR10V1
RARRES3
DIRC3
LRP5L
MCTS1
HSH2D
SUMO2
CSF3
RAB3GAP2
ZFHX2
GBP4
AX747756
CD69
GDAP2
IFI44L
C17orf64
ZNF385A
C17orf62
ISG20
PTPRR
SLC16A12
LMO2
CAMK2D
LRRFIP1
DNAJB13
SLC16A10
DHODH
FLT4
RICTOR
SLC38A4
UNQ2560
USP15
POLA1
SERPINB9
ROCK2
KCNJ4
MYO15B
BTN3A3
LMO4
PLCB4
MTRF1
PPM1E
DLL1
PRDM15
FAM71D
PLEKHG4B
VGF
ANO5
DLX2
GPR89C
DKFZP779J2370
IRAK3
EHF
GAS2L3
CD151
MED6
RILPL1
BATF
NKD1
APOBEC3G
ATP10A
TRERF1
KCNT2
STON1
EGFR
CPM
POPDC2
MYOM1
MYB
FER
PGA3
RP11-352D3.2
C1orf234
GALNT16
RP2
ZNF366
USP49
C8orf22
OR52B6
IL1B
RAX
CASZ1
C1QTNF1
TAP1
NKX3-1
IL7
RAPSN
AZI2
CDH13
IFITM1
PXT1
LIMD1
ARL5B
AQP3
OTUD4
RANGAP1
TTF1
HELZ2
TNFAIP8
RABEP2
XXYLT1
MRFAP1
FITM1
CGREF1
CDKN2D
RP11-362K2.2
ATR
SAA1
TLE4
BTC
GK
KALRN
AIM2
TYW5
C3orf33
DKK2
TCAF2
PLEKHA5
CDCP1
RASSF7
CYP2J2
RIPK3
DHX58
USO1
COL16A1
C1S
DDX52
SCFD1
TAGAP
CMPK2
ST8SIA4
EGFLAM
VAV3
NCEH1
AHRR
TDRD7
NCR3LG1
CAPNS2
IFITM3
GALNT11
PARP10
TMEM132A
SOCS1
MON2
PCDH11X
SAMHD1
SLC2A12
MPP5
CDKL3
PDZK1
TEX19
GIPC2
FBXO6
UCHL1
LRRN1
ARRDC5
CASP10
ZFP28
DNAH5
C21orf91
CHRNA1
COL25A1
HHATL
MAD2L1BP
CACNA1I
TTN
LIPA
SIDT1
ELF1
CDH20
CEACAM1
VPS13C
ALOX5AP
TNFAIP3
LYPD4
GGT7
SLC7A7
SMG6
ZNF816-ZNF321P
LRCH2
PPM1B
LOC100133331
POLR2G
GZF1
PCDHB8
IL7R
PAX3
CA8
DUSP16
PKP2
ASAH2B
NDRG1
BRIP1
HECTD4
GULP1
WRN
WDFY4
NUDC
NHS
CD47
NBPF3
GDF1
KIFAP3
NBEAL1
HLA-B
PLA1A
PRDX4
SCOC
ASB14
IGFBP5
G2E3
ZNF202
FAAP20
AK097289
HLA-C
SETBP1
UNC93B1
RABGAP1
CTD-3088G3.8
CNP
RIC3
RFTN2
GJD3
CORIN
TTLL6
LSMEM1
GPHN
GDPGP1
CCL8
TMEM140
STAT2
MUC4
LOC388312
LHX1
CCDC68
ACBD7
SYF2
SLC7A8
PLCE1
CXCL16
GLYAT
AACS
SYT15
LBH
ZADH2
AIDA
TXNL1
KIAA0226
GOLGA6L10
IKZF5
ACTA2
LOX
ADAR
NRK
STXBP3
KIAA1755
NF1
ENO4
EPHX1
NPAS3
CHRM2
EAF2
RASSF10
ABLIM3
DUSP10
SMARCA1
SSPN
MET
CBLN3
PYCRL
ZC3H7A
TLDC2
