# Supplementary material for: N6-Methyladenosine Methyltransferase METTL3 Promotes Angiogenesis and Atherosclerosis by Upregulating the JAK2/STAT3 Pathway via m6A Reader IGF2BP1
Source: Front Cell Dev Biol. 2021 Dec 7;9:731810. doi: 10.3389/fcell.2021.731810 (PMC8689138; doi:10.3389/fcell.2021.731810)
Supplement: Supplementary file 6 [file Table5.xlsx]

## Sheet: Supplementary Table 5
Supplementary Table 5: Common genes in Supplementary Table 1, 2, and 4.
gene name	log2(fold change)	p_value	m6Afold change	P_value
TMEM229B	-2.89992	0.00205	156.1	2.40416e-10
RET	-2.36543	0.0006	9.85366	2.08628e-12
TRIM69	-1.94877	5e-05	3.01837	3.50126e-12
SYNPO2	-1.6926	5e-05	2.13584	5.03278e-07
ATP10A	-3.16333	0.0085	11.8118	7.43214e-14
WWC1	-1.29349	0.01355	11.4648	9.65253e-05
IFITM1	-2.89207	5e-05	8.58701	7.77276e-07
DSP	-1.99213	5e-05	3.85646	2.68194e-08
RUNX3	-1.99321	0.00025	2.6983	9.59263e-11
JAK2	-1.10446	5e-05	2.45297	1.49343e-11
RNF213	-2.05736	5e-05	3.75702	1.69713e-10
IFI35	-1.97796	5e-05	4.19011	1.79097e-11
GMPR	-2.11314	5e-05	3.04278	7.86567e-08
XRN1	-1.25991	5e-05	2.37998	3.96987e-07
PLSCR1	-1.40593	5e-05	2.79934	8.44664e-11
JADE2	-1.00032	0.0029	2.07787	2.74976e-11
LGALS8	-1.20423	0.00355	2.49541	0.000236466
SLC41A2	-1.05823	0.0003	2.48711	0.000102921
CAMK2D	-1.04324	5e-05	2.27901	9.86254e-05
TDRD7	-1.15778	5e-05	2.23638	3.65323e-11
HIVEP2	-1.01416	0.0054	2.09446	2.4739e-07
IFITM2	-1.69621	5e-05	2.08159	1.71148e-08
SEMA4D	-1.06645	0.00395	2.04282	2.24938e-05
CASZ1	-1.50415	0.00145	2.01829	0.000637048
